# Supplementary material for: Surface Electromyography in Dentistry—Past, Present and Future
Source: MDPI journal article supplement (doi:10.3390/jcm13051328), 2024-02-26
Supplement: s1 [file s1]

**Table S1.** Recommendations for a list of elements that should be included in the description of the sEMG study.

| No.      |                                                                                                          | Has been described?      |
|----------|----------------------------------------------------------------------------------------------------------|--------------------------|
| 1.       | How was the skin prepared for the study?                                                                 | <input type="checkbox"/> |
| 1.1.     | What was used to cleanse the skin and how?                                                               | <input type="checkbox"/> |
| 1.2.     | During what hours was the sEMG study conducted?                                                          | <input type="checkbox"/> |
| 2.       | How were the electrodes positioned?                                                                      | <input type="checkbox"/> |
| 2.1.     | Was the placement in accordance with the SENIAM program guidelines?                                      | <input type="checkbox"/> |
| 2.2.     | What kind of electrodes were used (what was the conductive surface area, and the specific manufacturer)? | <input type="checkbox"/> |
| 2.3.     | What was the maximum acceptable electrode impedance in the study?                                        | <input type="checkbox"/> |
| 3.       | What was the subject's position during the sEMG study?                                                   | <input type="checkbox"/> |
| 4.       | What was the research procedure like?                                                                    | <input type="checkbox"/> |
| 4.1.     | What activities were performed by the subject during the study?                                          | <input type="checkbox"/> |
| 4.2.     | How many repetitions were performed (what were the intervals between repetitions)?                       | <input type="checkbox"/> |
| 5.       | What sEMG equipment was used, and the specific manufacturer?                                             | <input type="checkbox"/> |
| 5.1.     | What was the sample rate?                                                                                | <input type="checkbox"/> |
| 5.2.     | What was the bandwidth (high-pass filter and low-pass filter cutoff frequencies)?                        | <input type="checkbox"/> |
| 5.3.     | What is the input impedance of the used sEMG?                                                            | <input type="checkbox"/> |
| 5.4.     | What was the common mode rejection ratio?                                                                | <input type="checkbox"/> |
| 5.5.     | What was the input range?                                                                                | <input type="checkbox"/> |
| 5.6.     | What was the baseline noise?                                                                             | <input type="checkbox"/> |
| 5.7.     | What were the other important details about the device?                                                  | <input type="checkbox"/> |
| 6.       | How was the signal processed?                                                                            | <input type="checkbox"/> |
| 6.1.     | Was there automatic processing?                                                                          | <input type="checkbox"/> |
| 6.1.1.   | If yes, was the exact name of the program and distributor given?                                         | <input type="checkbox"/> |
| 6.1.2.   | If no:                                                                                                   |                          |
| 6.1.2.1. | what filters were used?                                                                                  | <input type="checkbox"/> |
| 6.1.2.2. | in what order were the filters used?                                                                     | <input type="checkbox"/> |
| 6.1.2.3. | what software was used for this purpose (name of the software and the specific manufacturer)?            | <input type="checkbox"/> |
